# Supplementary material for: Electrospun Nanofibers Made of Silver Nanoparticles, Cellulose Nanocrystals, and Polyacrylonitrile as Substrates for Surface-Enhanced Raman Scattering
Source: PubMed Central journal article supplement (PMC5344577; doi:10.3390/ma10010068), 2017-01-14
Supplement: materials-10-00068-s001.pdf [file materials-10-00068-s001.pdf]

# Supplementary Materials: Electrospun Nanofibers Made of Silver Nanoparticles, Cellulose Nanocrystals and Polyacrylonitrile as Substrates for Surface-Enhanced Raman Scattering

Suxia Ren, Lili Dong, Xiuqiang Zhang, Tingzhou Lei, Franz Ehrenhauser, Kunlin Song, Mei-Chun Li, Xiuxuan Sun and Qinglin Wu

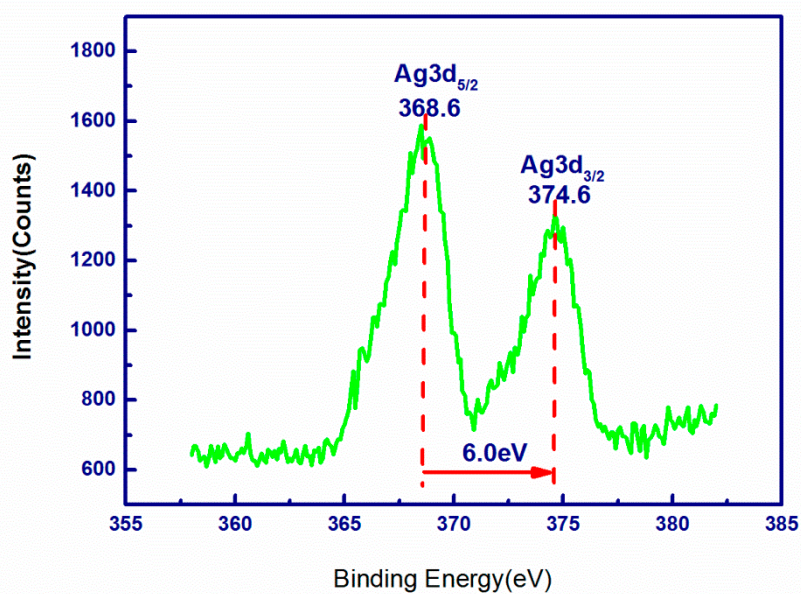

Figure S1. The XPS spectra of Ag 3d for PAN/CNC/Ag.

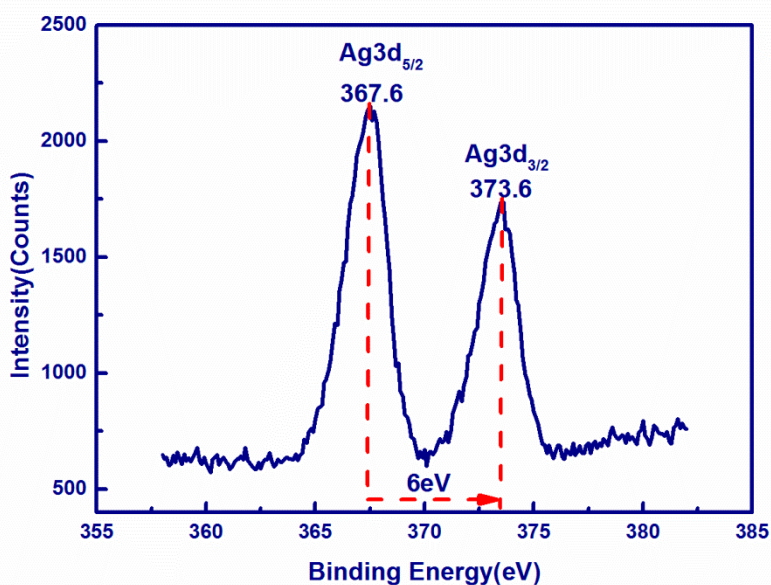

Figure S2. The XPS spectra of Ag 3d for PAN/CNC/Ag/Si.

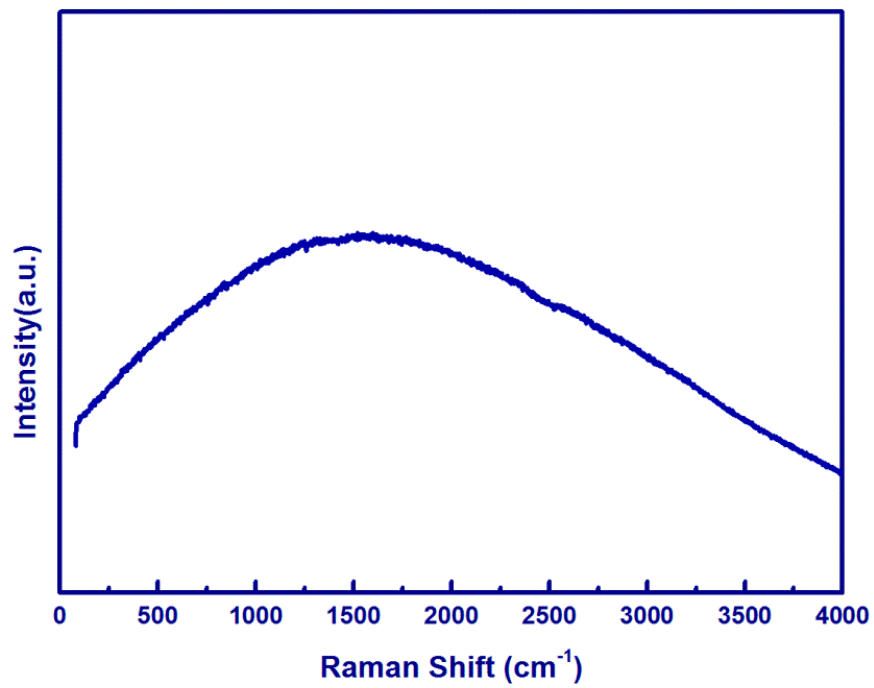

**Figure S3.** SERS spectrum of p-ATP ( $1 \times 10^{-4}$  M) recorded on randomly selected spots on the surface of PAN/Ag.

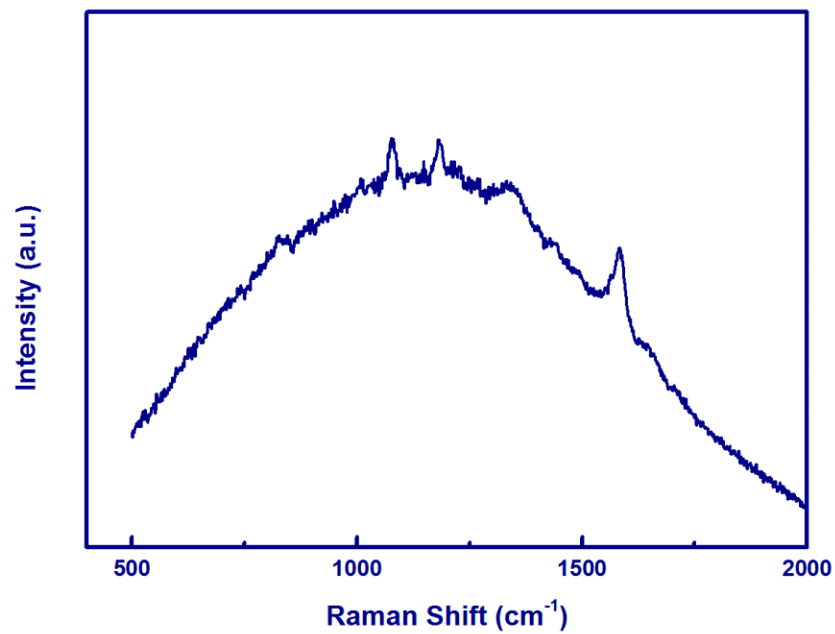

**Figure S4.** SERS spectrum of p-ATP ( $1 \times 10^{-4}$  M) recorded on randomly selected spots on the surface of PAN/CNC/Ag.

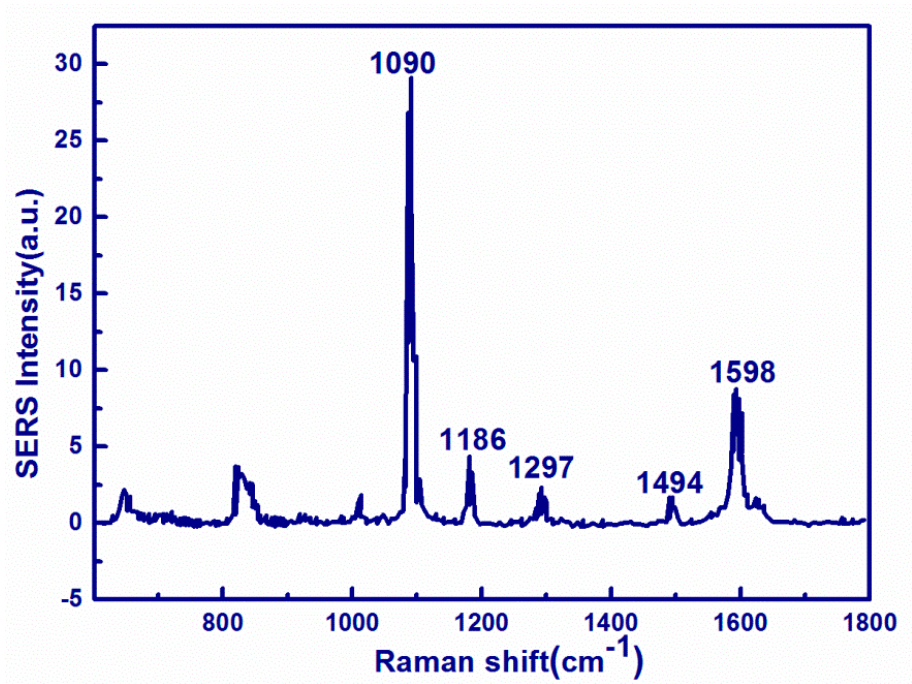

Figure S5. Normal Raman spectrum of solid p-ATP.
